# Supplementary material
Source: Springer Nature journal article supplement (https://www.springermedizin.de/resource/supplementary/12992_2010_81_MOESM8_ESM.pdf/9616464)

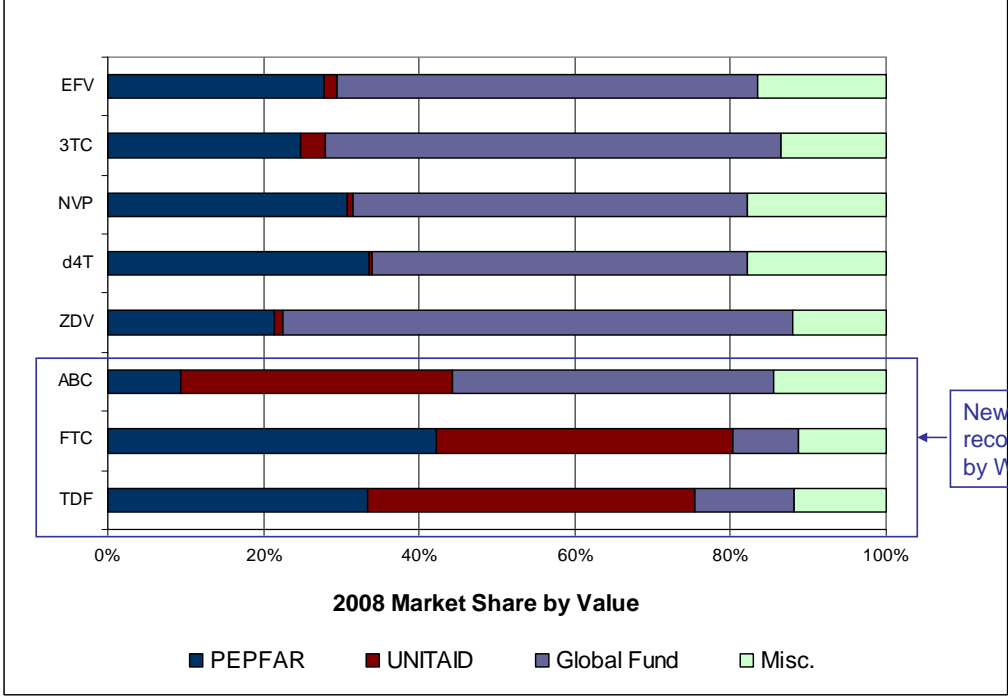

8a

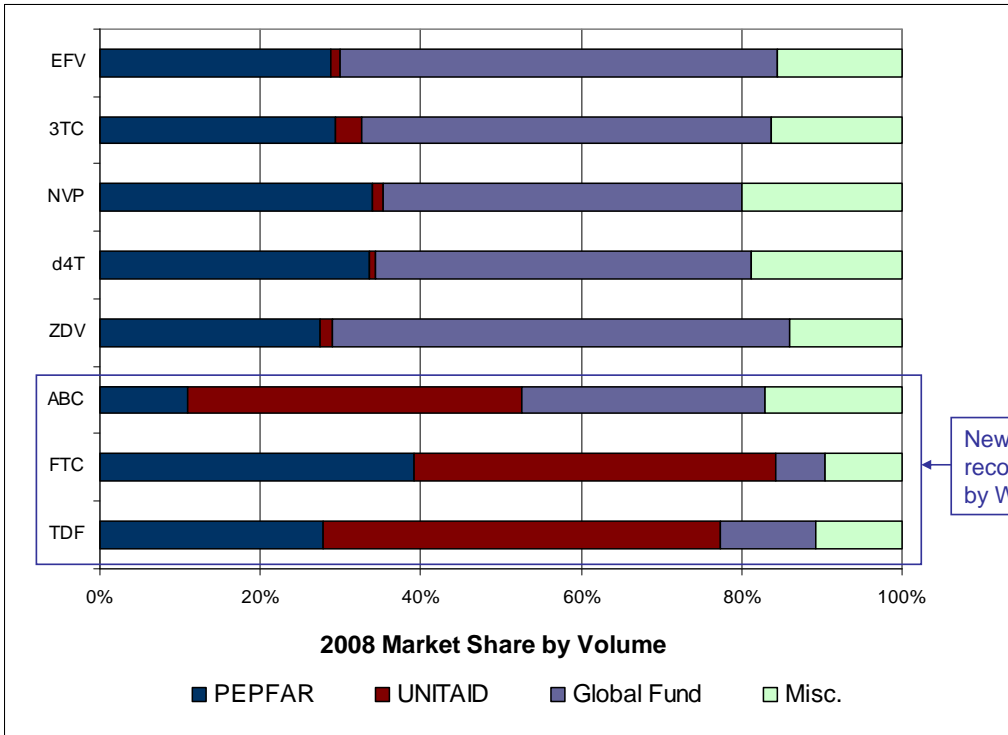

8b

Supplement: MOESM8 [file 9616464]
